# Supplementary material for: The role of diaphragmatic thickness measurement in weaning prediction and its comparison with rapid shallow breathing index: a single-center experience
Source: PubMed Central journal article supplement — Acute Crit Care. 2022 Jul 25;37(3):347–54. doi: 10.4266/acc.2022.00108 (PMC9475163; doi:10.4266/acc.2022.00108), 2022-07-25
Supplement: acc-2022-00108-suppl1.pdf [file acc-2022-00108-suppl1.pdf]

**Supplementary Table 1.** Comparison demographic and clinical variables between subgroups with successful and failed weaning

| Variable                            | Successful weaning (n=45) | Failed weaning (n=9) | P-value |
|-------------------------------------|---------------------------|----------------------|---------|
| Age (yr)                            | 41.78±17.9                | 43.56±11.9           | 0.778   |
| BMI (kg/m <sup>2</sup> )            | 23.3±3.7                  | 23.9±2.5             | 0.635   |
| APACHE II score                     | 20.02±6.2                 | 20.11±5.7            | 0.969   |
| SOFA II score                       | 4.69±1.8                  | 5.44±1.8             | 0.274   |
| MV day (day)                        | 6.35±3.96                 | 9.23±4.07            | 0.053   |
| Length of ICU stay (day)            | 9.90±6.46                 | 12.52±4.93           | 0.256   |
| Length of hospital stay (day)       | 11.92±6.36                | 14.12±5.77           | 0.343   |
| Tracheostomy (%)                    | 8 (17.8)                  | 6 (66.7)             | 0.002   |
| Mortality (%)                       | 5 (11.1)                  | 4 (44.4)             | 0.014   |
| Ventilator associated pneumonia (%) | 10 (22.2)                 | 5 (55.5)             | 0.1     |

Values are presented as mean±standard deviation or number (%).

BMI: body mass index; APACHE: Acute Physiology and Chronic Health Evaluation; SOFA: Sequential Organ Failure Assessment; MV: mechanical ventilation; ICU: intensive care unit.
