# Supplementary material for: The role of diaphragmatic thickness measurement in weaning prediction and its comparison with rapid shallow breathing index: a single-center experience
Source: PubMed Central journal article supplement — Acute Crit Care. 2022 Jul 25;37(3):347–54. doi: 10.4266/acc.2022.00108 (PMC9475163; doi:10.4266/acc.2022.00108), 2022-07-25
Supplement: acc-2022-00108-suppl2.pdf [file acc-2022-00108-suppl2.pdf]

**Supplementary Table 2.** Mean and percentage changes in diaphragmatic thickness during inspiration and expiration

| Variable |              | Case        | Control    | P-value |
|----------|--------------|-------------|------------|---------|
| Mean tdi | Tdi EE-right | 0.19±0.02   | 0.19±0.01  | 0.43    |
|          | Tdi-El-right | 0.27±0.04   | 0.28 ±0.02 | 0.37    |
|          | Tdi-EE-left  | 0.19±0.02   | 0.19±0.01  | 0.24    |
|          | Tdi-El-left  | 0.27±0.04   | 0.29±0.06  | 0.23    |
| %Δtdi    | Δtdi% Right  | 44.62±12.99 | 47.21±8.94 | 0.24    |
|          | Δtdi% Left   | 45.75±16.67 | 46.85±8.37 | 0.77    |
|          | Δtdi% Total  | 46.30±12.51 | 47.02±8.15 | 0.73    |

Values are presented as mean±standard deviation.

tdi: diaphragmatic thickness; %Δtdi: percent change in diaphragmatic thickness; EE: end expiration; El: end inspiration.
