# Supplementary material for: The role of diaphragmatic thickness measurement in weaning prediction and its comparison with rapid shallow breathing index: a single-center experience
Source: PubMed Central journal article supplement — Acute Crit Care. 2022 Jul 25;37(3):347–54. doi: 10.4266/acc.2022.00108 (PMC9475163; doi:10.4266/acc.2022.00108), 2022-07-25
Supplement: acc-2022-00108-suppl5.pdf [file acc-2022-00108-suppl5.pdf]

**Supplementary Table 5.** Reasons for failed weaning in study population

| Parameter                                            | Weaning failure<br>(n=9) |
|------------------------------------------------------|--------------------------|
| Percent change in diaphragmatic thickness <29.71     | 4                        |
| Mucus impaction                                      | 1                        |
| Ventilator associated pneumonia and secondary sepsis | 3                        |
| Abdominal sepsis                                     | 1                        |
