# Supplementary material for: The role of diaphragmatic thickness measurement in weaning prediction and its comparison with rapid shallow breathing index: a single-center experience
Source: PubMed Central journal article supplement — Acute Crit Care. 2022 Jul 25;37(3):347–54. doi: 10.4266/acc.2022.00108 (PMC9475163; doi:10.4266/acc.2022.00108), 2022-07-25
Supplement: acc-2022-00108-suppl6.pdf [file acc-2022-00108-suppl6.pdf]

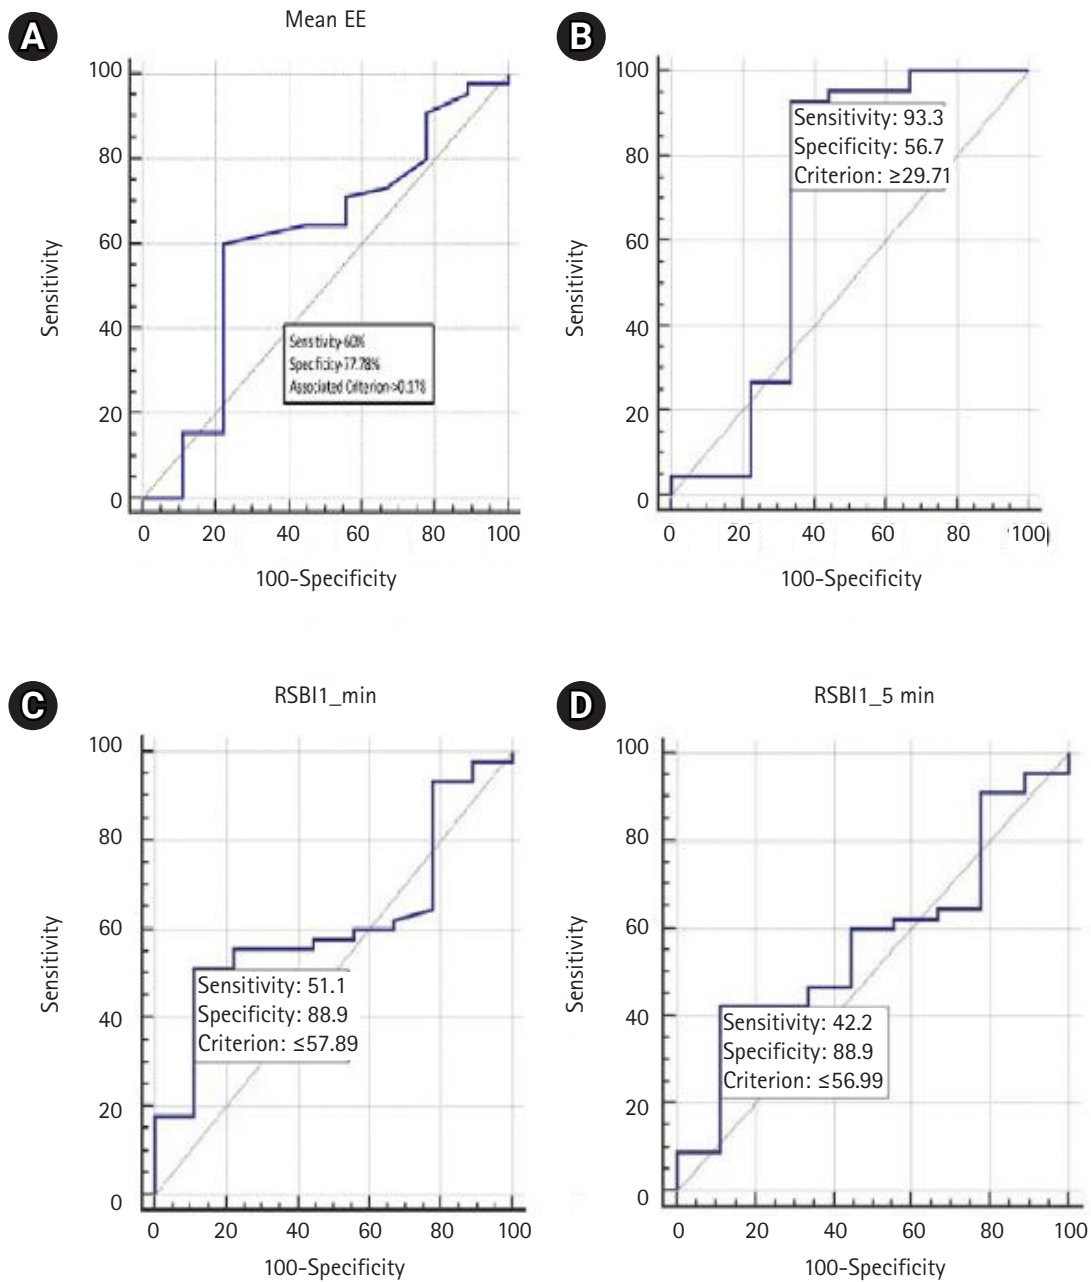

**Supplementary Figure 1.** Area Under Curve (AUC). (A) AUC of mean expiratory diaphragmatic thickness. (B) AUC of mean percent change in diaphragmatic thickness. (C) AUC of rapid shallow breathing index (RSBI) taken at 1 minutes and (D) at 5 minutes to predict successful weaning in intubated patients. EE: end expiration.
